# Intracellular $\text{Ca}^{2+}$ - $\text{Mg}^{2+}$ -ATPase Regulates Calcium Influx and Acrosomal Exocytosis in Bull and Ram Spermatozoa<sup>1</sup>

E. Dragileva, S. Rubinstein, and H. Breitbart<sup>2</sup>

Faculty of Life Sciences, Bar-Ilan University, Ramat-Gan 52900, Israel

## ABSTRACT

Calcium influx is required for the mammalian sperm acrosome reaction (AR), an exocytotic event occurring in the sperm head prior to fertilization. We show here that thapsigargin, a highly specific inhibitor of the microsomal  $\text{Ca}^{2+}$ - $\text{Mg}^{2+}$ -ATPase ( $\text{Ca}^{2+}$  pump), can initiate acrosomal exocytosis in capacitated bovine and ram spermatozoa. Initiation of acrosomal exocytosis by thapsigargin requires an influx of  $\text{Ca}^{2+}$ , since incubation of cells in the absence of added  $\text{Ca}^{2+}$  or in the presence of the calcium channel blocker,  $\text{La}^{3+}$ , completely inhibited thapsigargin-induced acrosomal exocytosis. ATP-Dependent calcium accumulation into nonmitochondrial stores was detected in permeabilized sperm in the presence of ATP and mitochondrial uncoupler. This activity was inhibited by thapsigargin. Thapsigargin elevated the intracellular  $\text{Ca}^{2+}$  concentration ( $[\text{Ca}^{2+}]_i$ ), and this increase was inhibited when extracellular  $\text{Ca}^{2+}$  was chelated by EGTA, indicating that this rise in  $\text{Ca}^{2+}$  is derived from the external medium. This rise of  $[\text{Ca}^{2+}]_i$  took place first in the head and later in the midpiece of the spermatozoon. However, immunostaining using a polyclonal antibody directed against the purified inositol 1,4,5-tris-phosphate receptor ( $\text{IP}_3$ -R) identified specific staining in the acrosome region, in the postacrosome, and along the tail, but not in the midpiece region. No staining in the acrosome region was observed in sperm without acrosome, indicating that the acrosome cap was stained in intact sperm. The presence of  $\text{IP}_3$ -R in the anterior acrosomal region as well as the induction, by thapsigargin, of intracellular  $\text{Ca}^{2+}$  elevation in the acrosomal region and acrosomal exocytosis, implicates the acrosome as a potential cellular  $\text{Ca}^{2+}$  store. We suggest here that the cytosolic  $\text{Ca}^{2+}$  is actively transported into the acrosome by an ATP-dependent, thapsigargin-sensitive  $\text{Ca}^{2+}$  pump and that the accumulated  $\text{Ca}^{2+}$  is released from the acrosome via an  $\text{IP}_3$ -gated calcium channel. The ability of thapsigargin to increase  $[\text{Ca}^{2+}]_i$  could be due to depletion of  $\text{Ca}^{2+}$  in the acrosome, resulting in the opening of a capacitance calcium entry channel in the plasma membrane. The effect of thapsigargin on elevated  $[\text{Ca}^{2+}]_i$  in capacitated cells was 2-fold higher than that in noncapacitated sperm, suggesting that the intracellular Ca pump is active during capacitation and that this pump may have a role in regulating  $[\text{Ca}^{2+}]_i$  during capacitation and the AR.

## INTRODUCTION

Intracellular  $\text{Ca}^{2+}$  has a regulatory role in the control of sperm motility, capacitation, and the acrosome reaction. The use of  $\text{Ca}^{2+}$  by the cell as an intracellular messenger requires precise regulation of its intracellular concentration [1]. Proposed regulatory sites of sperm intracellular calcium include both the plasma membrane [2] and the mitochondria [3–5]. The fact that sperm intracellular  $\text{Ca}^{2+}$  is maintained at a very low level ( $< 0.1 \mu\text{M}$ ) in a medium con-

taining millimolar  $\text{Ca}^{2+}$  supports the concept that the plasma membrane is the primary regulatory site. However, though several groups have described systems involved in sperm  $\text{Ca}^{2+}$  secretion [6, 7] and influx [2], little is known about the role of intracellular membranes in regulating  $\text{Ca}^{2+}$  in spermatozoa.

It has been shown that thapsigargin, a highly specific inhibitor of the microsomal  $\text{Ca}^{2+}$  pump, can induce elevation of intracellular free calcium  $[\text{Ca}^{2+}]_i$  [8, 9] and initiate the acrosome reaction (AR) [9, 10] in human and bovine spermatozoa. Putative sites for thapsigargin-sensitive intracellular  $\text{Ca}^{2+}$  stores include the cytoplasmic droplet, the sperm nucleus, and the acrosome. In a more recent study, it was shown that inositol 1,4,5-tris-phosphate receptors ( $\text{IP}_3$ -R) are selectively localized to the acrosomes of rat, hamster, mouse, and dog sperm, suggesting that the acrosome is an intracellular  $\text{Ca}^{2+}$  store [11]. Moreover, working with isolated acrosomal membranes, we recently observed that these membranes possess an ATP-dependent  $\text{Ca}^{2+}$  pump that is inhibited by thapsigargin [12].

Walensky and Snyder [11] studied permeabilized rat sperm treated with sodium azide to follow ATP-dependent  $\text{Ca}^{2+}$  loading into nonmitochondrial  $\text{Ca}^{2+}$  stores. However, using azide to block the mitochondrial electron transport chain does not prevent the buildup of a proton gradient in the mitochondria due to ATP hydrolysis, resulting in active  $\text{Ca}^{2+}$  transport into the mitochondria.

In the present study, we used a mitochondrial uncoupler to prevent the buildup of a proton gradient; therefore no active accumulation of  $\text{Ca}^{2+}$  in the mitochondria occurred. Thus, this is the first definitive demonstration of the presence of an intracellular nonmitochondrial ATP-dependent  $\text{Ca}^{2+}$  pump in mammalian spermatozoa. A role for this internal calcium store in capacitation and in the AR is suggested.

## MATERIALS AND METHODS

### Materials

Thapsigargin, rabbit anti- $\text{IP}_3$ -R polyclonal antibody, and fluorescein isothiocyanate (FITC)-conjugated goat anti-rabbit secondary antibodies were purchased from Calbiochem (San Diego, CA);  $^{45}\text{CaCl}_2$  from New England Nuclear (Boston, MA); and Fura-2/AM and Fluo-3/AM from Molecular Probes (Eugene, OR). All other materials were purchased from Sigma Chemical Co. (St. Louis, MO).

### Sperm Preparation

Ejaculated bull and ram spermatozoa were obtained using an artificial vagina. The semen was washed three times by centrifugation ( $780 \times g$ , 10 min at  $25^\circ\text{C}$ ) in NKM buffer containing 110 mM NaCl, 5 mM KCl, and 10 mM 3-[N-morpholino]propanesulfonic acid, pH 7.4. The washed cells were suspended in NKM buffer to a concentration of  $10^9$  cells/ml and were maintained at room temperature until use.

Accepted June 17, 1999.

Received April 26, 1999.

<sup>1</sup>This research was supported by the Israel Science Foundation funded by The Academy of Sciences and Humanities and by Ihel Foundation to H.B.

<sup>2</sup>Correspondence. FAX: 972 3 5344766; e-mail: breith@mail.biu.ac.il

### Capacitation and AR

In vitro capacitation of bovine sperm was accomplished by the method of Parrish et al. [13]. Briefly, sperm pellets were resuspended to a final concentration of  $10^8$  cells/ml in glucose-free TALP medium containing (in mM) 100 NaCl, 3.1 KCl, 1.5 MgCl<sub>2</sub>, 25 NaHCO<sub>3</sub>, 0.29 KH<sub>2</sub>PO<sub>4</sub>, 21.6 sodium lactate, 0.1 sodium pyruvate, 2 CaCl<sub>2</sub>, 20 Hepes (pH 7.4) and 50 µg/ml BSA, 10 U/ml penicillin, and 20 µg/ml heparin. The cells were incubated in this capacitation medium for 4 h at 39°C with 5% CO<sub>2</sub>. At the end of the capacitation, the AR inducer thapsigargin or the Ca<sup>2+</sup> ionophore A23187 was added for an additional 20 min of incubation. The occurrence of AR was determined using two methods: first, assay of the release of acrosin from acrosome-reacted cells [14]; second, staining of cells by *Pisum sativum* agglutinin (PSA), whereby intact cells are stained and acrosome reacted cells are not [15]. For determination of acrosin release from the cells, the cells were pelleted by centrifugation (7500 × g, 5 min 4°C), and the supernatant was adjusted to pH 3.0 with HCl; acrosin activity was determined by the esterolytic assay using benzoylarginine ethyl ester as substrate and recording the optical density increase at 259 nm with time. The molar absorption coefficient was taken as 1150. All the values are given after subtraction of the spontaneous acrosin release.

Staining with PSA was performed using a modification of the method described by Mendoza et al. [15]. Samples of cells treated to induce the AR were smeared on microscope slides. After air drying, sperm smears were dipped in absolute methanol for 30 sec and allowed to dry rapidly. Methanol-fixed smears were incubated with blocking solution (PBS containing 1% BSA) for 10 min, then with biotin-conjugated PSA (50 µg/ml) in PBS containing 1% BSA for 30 min, and finally with peroxidase-conjugated extravidin (1:400) for 10 min. All incubations were performed in a humid chamber. The slides were washed between incubations by dipping in PBS for 5 min. The substrate (AEC from Histostain-SP kit; Zymed Laboratories, South San Francisco, CA) was then added for 10 min; this was followed by washing with distilled water. Hematoxylin was usually used for counterstaining (3 min). The slides were mounted with GVA mounting medium (Zymed) and examined under a brightfield microscope. Cells with red staining over the acrosomal cap were considered acrosome intact, and cells with equatorial red staining or no staining at all were considered acrosome reacted; 200 cells were counted per slide.

### <sup>45</sup>Ca<sup>2+</sup> Loading Into Permeabilized Cells

Washed spermatozoa in NKM buffer ( $4 \times 10^8$  cells/ml) were incubated with 10 µM digitonin for 2 min. These permeabilized cells were washed twice at 4°C in buffer M comprising 250 mM mannitol, 70 mM sucrose, and 10 mM Hepes, pH 7.4 (the pH was adjusted by tetraethylammonium) and kept on ice until use. For the determination of ATP-dependent Ca<sup>2+</sup> loading, the permeabilized cells were resuspended in buffer B containing 75 mM KCl, 1 mM MgCl<sub>2</sub>, 5 mM NaH<sub>2</sub>PO<sub>4</sub>, 20 mM Hepes, pH 7.4 (with KOH), 10 mM dithiothreitol, 3% polyethylene glycol (average  $M_r$  8000), 10 µM carbonyl cyanide *p*-trifluoromethoxy-phenylhydrazine (FCCP), 0.05 mM CaCl<sub>2</sub> (free Ca<sup>2+</sup> ~1 µM), and 3 µCi/ml <sup>45</sup>CaCl<sub>2</sub>. The cell suspension was incubated at 37°C, and the reaction was started by addition of 2 mM ATP. At appropriate time intervals, a 0.1-ml aliquot was removed and vacuum-filtered on GF/C filters. The

cells trapped on filters were washed three times with 5 ml of buffer containing 100 mM KCl, 10 mM Hepes, pH 7.4, 5 mM MgCl<sub>2</sub>, and 1 mM EGTA. Radioactivity of dry filters was determined by liquid scintillation in 4 ml of EcoLume (ICN, Costa Mesa, CA).

### <sup>45</sup>Ca<sup>2+</sup> Loading Into Isolated Plasma Membrane Vesicles

Preparation of sperm plasma membrane vesicles and ATP-dependent Ca<sup>2+</sup> uptake into these vesicles were performed as described by us previously [6].

### Determination of Intracellular Calcium

The intracellular concentration of free Ca<sup>2+</sup> was assessed using the fluorescent calcium indicator Fura-2 [16]. Washed cells ( $4 \times 10^8$ /ml) were incubated in buffer A for 60 min, at 37°C, with 4 µM Fura-2/AM. The loaded cells were then washed by centrifugation at 780 × g for 10 min to remove extracellular Fura-2, incubated for another 30 min, and washed twice as described above. The cells were used immediately for fluorescence measurements using a Shimadzu (Columbia, MD) RF-5000 spectrofluorophotometer, with the dual excitation wavelength set of 340 nm and 380 nm and emission of 500 nm. During fluorescence measurements, sperm suspensions were stirred at 37°C. The concentration of [Ca<sup>2+</sup>]<sub>i</sub> was calculated using an equation from Tsien et al. [17], [Ca<sup>2+</sup>]<sub>i</sub> =  $K_d(F - F_{\min})/(F_{\max} - F)$ , where  $K_d = 224$  nM.  $F_{\max}$  and  $F_{\min}$  were recorded at the end of each incubation.  $F_{\max}$  was determined after the addition of 1% Triton X-100.  $F_{\min}$  was determined in the presence of 2 mM MnCl<sub>2</sub>. All values were corrected for autofluorescence of the cells.

The spatial distribution of intracellular calcium was determined using a fluorescence microscopy imaging system as described by us recently [18]. Sperm cells were incubated on 25-mm glass coverslips covered with poly-L-lysine with Fluo-3/AM (2 µM) and pluronic acid (1.5 µM) for 30 min in glucose-enriched PBS in 37°C, 5% CO<sub>2</sub>. After incubation, each dish was rinsed twice with glucose-enriched PBS, and the coverslip was placed in the microscope holder. Cells were covered with 1 ml glucose-enriched PBS. Intracellular calcium measurements were performed using a fluorescence microscopic system consisting of an inverted epifluorescence microscope (Axiovert 135M; Zeiss, Oberkochen, Germany), an intensified charge-coupled device C2400 camera (Hamamatsu, Hamamatsu City, Japan), and frame-grabbing software (Galai, Migdal-Haemeck, Israel). A 75-W xenon lamp served as the source for excitation. A 510 long-pass emission filter was used to select fluorescence emission. The first pictures were taken to estimate basal levels of fluorescence. Afterward, cells were irradiated in situ and the fluorescence was measured every 30 sec for 10 min. Analysis of intracellular calcium levels was performed employing Scan Array 2 software (Galai).

### Immunocytochemistry and Indirect Immunofluorescence

Sperm cells were collected on glass slides in a cytocentrifuge (1000 rpm, 5 min). The cells were fixed and permeabilized with cold acetone and methanol (10 min each). The slides were then washed in TBS (137 mM NaCl, 20 mM Tris-HCl, pH 7.6) three times, 5 min each, and non-specific sites were blocked for 30 min with 1% BSA in TBS. For indirect immunofluorescence staining, slides were incubated with polyclonal anti-IP<sub>3</sub>-R antibody (rabbit) at concentration of 1 µg/ml for 2 h at room temperature. Con-

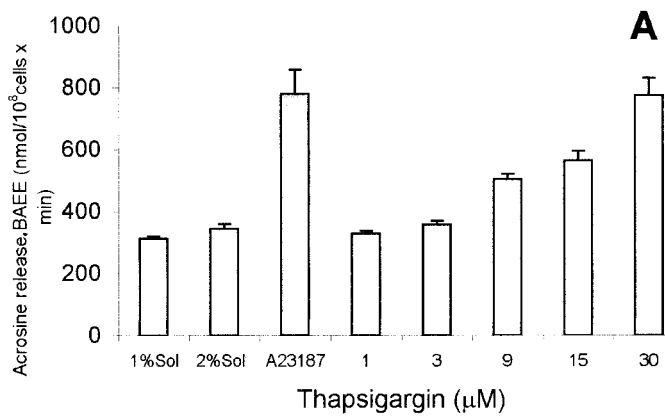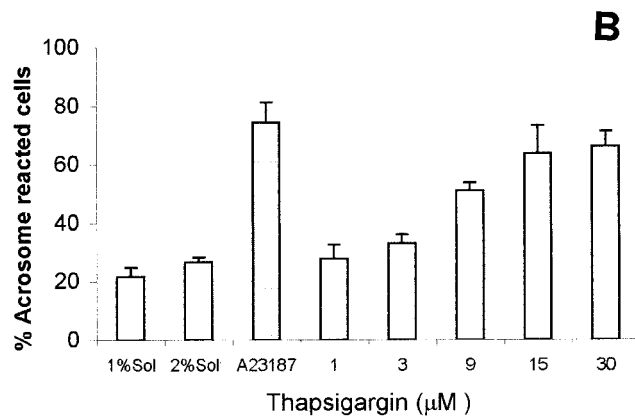

FIG. 1. Dose response for the effect of thapsigargin on the AR. Bovine sperm ( $10^8$  cells/ml) were capacitated for 4 h in TALP medium containing heparin, followed by 20 min of incubation in the presence of increased concentrations of thapsigargin. The thapsigargin was dissolved in dimethylformamide:ethanol (1:3), and the final solvent concentration was 1% except in 30  $\mu$ M thapsigargin, in which its concentration was 2%. Values are mean  $\pm$  SD of duplicates from 3 different males. **A**) AR determined by assaying acrosin release from the cells. The results with 9, 15, and 30  $\mu$ M thapsigargin were significantly different from the control values ( $P < 0.001$ ). **B**) AR determined by PSA staining. The results with 9, 15, and 30  $\mu$ M thapsigargin were significantly different from the control values ( $P < 0.001$ ).

controls for IP<sub>3</sub>-R staining were performed using normal rabbit serum. Slides were washed in TBS three times (5 min each), air dried, and incubated for 10 min in the dark with 1:10 000-diluted FITC-conjugated goat anti-rabbit IgG secondary antibody; they were then washed again in TBS three times, 5 min each. Coverslips were placed with fluoro-

TABLE 1. Dose response for the effect of thapsigargin and La<sup>3+</sup> on the acrosome reaction in ram sperm (% acrosome-reacted cells).\*

| Inhibitor                   | Thapsigargin ( $\mu$ M) |               |              |              |              |
|-----------------------------|-------------------------|---------------|--------------|--------------|--------------|
|                             | 0                       | 1             | 5            | 15           | 30           |
| None                        | 25 $\pm$ 3.0            | 2.7 $\pm$ 3.0 | 35 $\pm$ 4.0 | 44 $\pm$ 5.0 | 60 $\pm$ 6.3 |
| LaCl <sub>3</sub> (0.25 mM) | 19 $\pm$ 4.0            | —             | 19 $\pm$ 3.0 | —            | 25 $\pm$ 4.0 |

\* Ram sperm ( $10^8$  cells/ml) were incubated for 4 h in NKM buffer containing 2 mM CaCl<sub>2</sub> followed by 20 min of incubation in the presence of the indicated concentration of thapsigargin; LaCl<sub>3</sub> (0.25 mM) was added 5 min before adding thapsigargin; reaction was determined by PSA staining; values are means  $\pm$  S.D. of duplicates from 3 independent experiments.

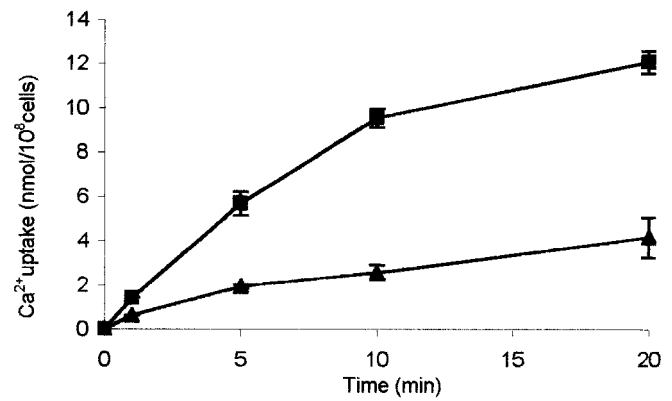

FIG. 2. Effect of the uncoupler FCCP on ATP-dependent Ca<sup>2+</sup> uptake in permeabilized sperm. Washed bovine spermatozoa ( $10^8$  cells/ml) were permeabilized, washed, and resuspended in buffer B (see *Materials and Methods*) in the presence (triangles) or absence (squares) of FCCP (10  $\mu$ M). The reaction was started by adding 2 mM ATP, and at various time intervals, 0.1 ml was removed, washed, and counted for radioactivity. The values shown represent the mean  $\pm$  SD of duplicates from 3 different males.

guard antifade reagent, and the slides were examined by Venox (Olympus, Melville, NY) AHB3 immunofluorescence microscopy.

## RESULTS

### Induction of the AR by Thapsigargin

Thapsigargin selectively inhibits the Ca<sup>2+</sup>-Mg<sup>2+</sup> ATPase (Ca<sup>2+</sup> pump) of intracellular membranes and does not affect the Ca<sup>2+</sup> pump of the plasma membrane [19]. To determine whether the AR is induced by mobilization of internal calcium stores, we determined the ability of thapsigargin to induce this reaction. Addition of increased concentrations of thapsigargin to capacitated bovine sperm at a concentration range of 1–30  $\mu$ M significantly enhanced the AR (Fig. 1). This effect of thapsigargin could not be found in non-capacitated bovine sperm. The occurrence of AR was determined by two different assays, morphological and biochemical, and similar results were obtained. At 15  $\mu$ M thapsigargin, a maximal effect was seen in which 58% of the cells were acrosome-reacted. A similar effect of thapsigargin on the AR in ram sperm was observed, but here the maximal effect on AR was seen at 30  $\mu$ M thapsigargin (Table 1). Preincubation of spermatozoa with the calcium channel blocker La<sup>3+</sup> (250  $\mu$ M) completely inhibited thapsigargin-stimulated AR (Table 1).

### Determination of Intracellular ATP-Dependent Ca<sup>2+</sup> Pump Activity

The stimulation of AR induced by thapsigargin suggests that spermatozoa contain an intracellular, membrane-associated ATP-dependent Ca<sup>2+</sup> pump. We used digitonin-permeabilized ram and bull sperm to follow ATP-dependent accumulation of Ca<sup>2+</sup> in intracellular nonmitochondrial Ca<sup>2+</sup> stores. Added ATP can be hydrolyzed by the sperm mitochondria to create membrane potential via the H<sup>+</sup>-ATPase, resulting in active accumulation of Ca<sup>2+</sup> in the mitochondria. In order to eliminate this effect, it is not sufficient to block the respiratory chain as performed by Walensky and Snyder [11], since under these conditions the mitochondrial H<sup>+</sup>-ATPase can still create membrane potential. Therefore, in this study we used the mitochondrial un-



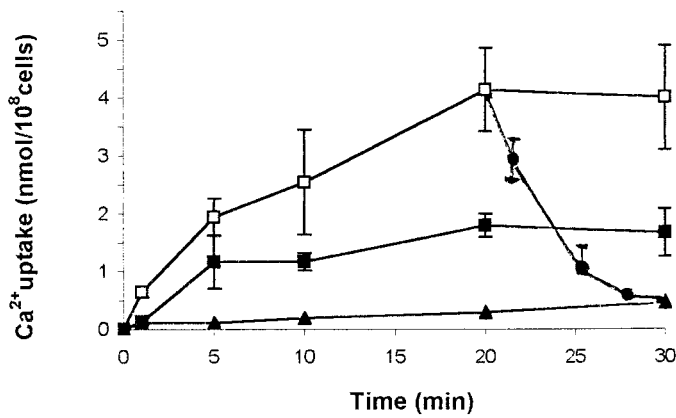

FIG. 3. ATP-dependent  $\text{Ca}^{2+}$  uptake into nonmitochondrial calcium stores in permeabilized sperm. Bovine spermatozoa ( $10^8$  cells/ml) were permeabilized, washed, and resuspended in buffer B containing  $10 \mu\text{M}$  FCCP. The reaction was initiated by adding  $2 \text{ mM}$  ATP or buffer (control without ATP). Thapsigargin ( $10 \mu\text{M}$ ) was added 5 min before addition of ATP. At various time intervals,  $0.1 \text{ ml}$  cell suspension was removed, washed, and counted for radioactivity. The values are the mean  $\pm$  SD of duplicates from 3 different males. Control: open squares; thapsigargin: solid squares; no ATP or ATP plus  $10 \mu\text{M}$  A23187: triangles;  $10 \mu\text{M}$  A23187 added at 20 min to control: circles.

coupler FCCP, which dissipates the membrane potential, preventing active transport of  $\text{Ca}^{2+}$  into the mitochondria.

It can be seen in Figure 2 that ATP-dependent  $\text{Ca}^{2+}$  uptake into permeabilized sperm was strongly inhibited by FCCP, indicating that ATP-dependent  $\text{Ca}^{2+}$  uptake by the sperm mitochondria occurs in this system. After 20 min of incubation, about  $11 \text{ nmol Ca}^{2+}/10^8$  cells was taken up in absence of FCCP, whereas in the presence of the uncoupler, only about  $4 \text{ nmol Ca}^{2+}/10^8$  cells was taken up. These results indicate that 64% of the ATP-dependent  $\text{Ca}^{2+}$  uptake was accumulated in the mitochondria and only 36% in nonmitochondrial  $\text{Ca}^{2+}$  stores.

A time-dependent increase in ATP-dependent  $\text{Ca}^{2+}$  uptake into nonmitochondrial  $\text{Ca}^{2+}$  stores in permeabilized spermatozoa is seen in Figure 3. Very little  $\text{Ca}^{2+}$  uptake was observed in the absence of ATP or in the presence of

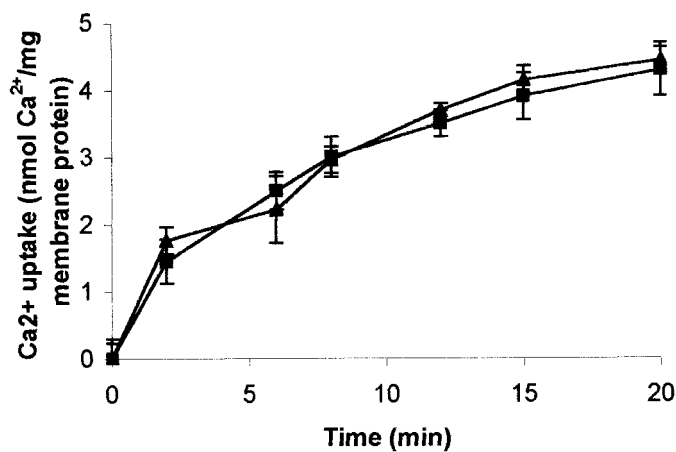

FIG. 4. ATP-dependent  $\text{Ca}^{2+}$  uptake into isolated plasma membrane vesicles from bovine sperm,  $\text{Ca}^{2+}$  uptake activity was assayed as described by us previously [6]. The reaction was started by adding  $2 \text{ mM}$  ATP, and thapsigargin ( $10 \mu\text{M}$ ) was added 5 min before the ATP. Each point represents the mean  $\pm$  SD of duplicate sample determination from three membrane preparations from 3 different bulls. Control: triangles; thapsigargin: squares.

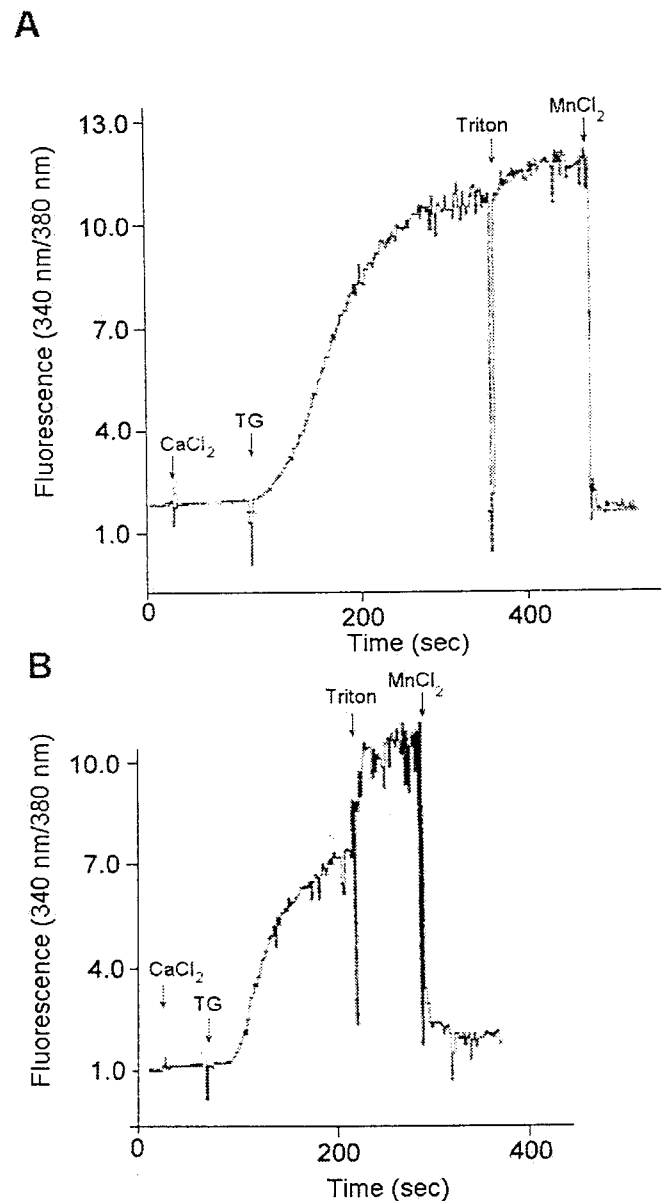

FIG. 5. Effect of thapsigargin on sperm  $[\text{Ca}^{2+}]_i$ . Intact sperm cells ( $5 \times 10^6$  cells/ml) incubated in NKM buffer were loaded with Fura-2/AM, and the changes in  $[\text{Ca}^{2+}]_i$  were recorded using the spectrofluorophotometer (see *Materials and Methods*). At the times indicated by the arrows, the following substances were added (final concentration):  $2 \text{ mM}$   $\text{CaCl}_2$ ,  $3 \mu\text{M}$  thapsigargin (TG),  $0.1\%$  Triton X-100, and  $2 \text{ mM}$   $\text{MnCl}_2$ . The data represent one typical experiment out of four repetitions performed with 4 different males. **A**) Ram sperm:  $[\text{Ca}^{2+}]_i$  was  $35 \pm 12 \text{ nM}$  after addition of  $\text{CaCl}_2$  and  $1600 \pm 200 \text{ nM}$  after addition of thapsigargin. **B**) Bull sperm:  $[\text{Ca}^{2+}]_i$  was  $25 \pm 10 \text{ nM}$  after addition of  $\text{CaCl}_2$  and  $600 \pm 100 \text{ nM}$  after addition of thapsigargin.

the  $\text{Ca}^{2+}$  ionophore A23187, and the ATP-dependent  $\text{Ca}^{2+}$  uptake was highly inhibited by thapsigargin.

The addition of the  $\text{Ca}^{2+}$  ionophore A23187 to  $\text{Ca}^{2+}$ -loaded cells after 20-min incubation caused fast release of the accumulated  $\text{Ca}^{2+}$ , suggesting that  $\text{Ca}^{2+}$  is moved into nonmitochondrial  $\text{Ca}^{2+}$  stores by an active transport process. Thapsigargin did not inhibit ATP-dependent  $\text{Ca}^{2+}$  uptake in isolated plasma membrane vesicles from bovine sperm (Fig. 4), which indicates its specificity for intracellular  $\text{Ca}^{2+}$  pumps.

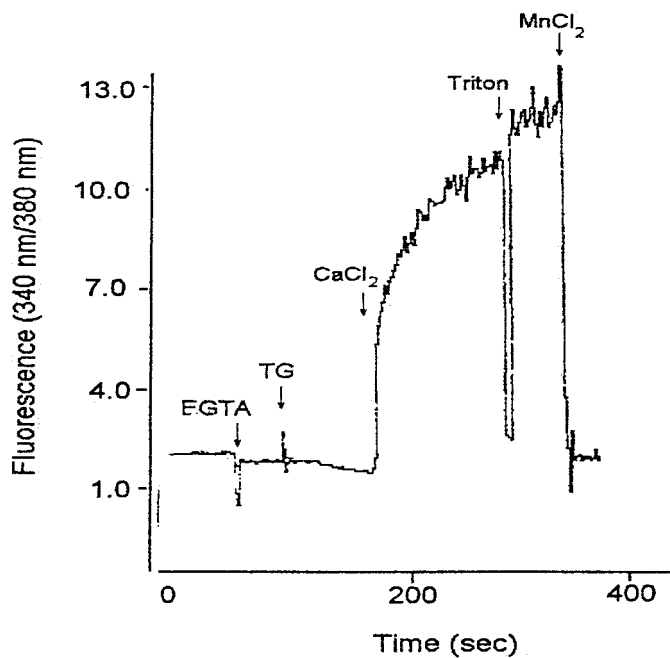

FIG. 6. Effect of thapsigargin on  $[Ca^{2+}]_i$  in absence or presence of extracellular  $Ca^{2+}$ . Intact ram sperm ( $5 \times 10^6$  cells/ml) were loaded with Fura-2/AM, and changes in  $[Ca^{2+}]_i$  were measured. See legend to Figure 5 for more details. At the times indicated by the arrows, the following substances were added (final concentration): 1.5 mM EGTA, 3  $\mu$ M thapsigargin (TG), 2 mM  $CaCl_2$ , 0.1% Triton X-100, and 2 mM  $MnCl_2$ . The data represent one typical experiment out of three repetitions performed with 3 different males.

#### Elevation of $[Ca^{2+}]_i$ by Thapsigargin

Intracellular  $Ca^{2+}$  concentrations were determined in Fura-2-loaded noncapacitated sperm. Low concentrations of thapsigargin (3  $\mu$ M) caused a fast and significant increase in  $[Ca^{2+}]_i$  in ram and bull spermatozoa (Fig. 5). This increase in  $[Ca^{2+}]_i$  could not be seen without addition of  $Ca^{2+}$  in the presence of the  $Ca^{2+}$  chelator EGTA (Fig. 6). These findings indicate that thapsigargin induces  $Ca^{2+}$  influx into the cells from the surrounding medium.

The effect of thapsigargin on the spatial distribution of intracellular  $Ca^{2+}$  was evaluated in Fluo-3-loaded intact, noncapacitated sperm using a fluorescence microscopy imaging system (Fig. 7). It can be seen that 150 sec after addition of  $Ca^{2+}$ , there was a significant increase of intracellular  $Ca^{2+}$  in the sperm head. The  $Ca^{2+}$  concentration started to increase in the midpiece where the sperm mitochondria are located only after 160 sec. After 200 sec, the  $[Ca^{2+}]_i$  in the head and the midpiece reached its maximal value (Fig. 7, see red color at 400 sec), which did not change during the next 40 sec. The increase in  $[Ca^{2+}]_i$  in the head under these conditions reflects the induction of AR by thapsigargin. The measurements of changes in  $[Ca^{2+}]_i$  in these experiments are summarized graphically in Figure 8.

#### Localization of the $IP_3$ -R in the Sperm

Localization of  $IP_3$ -R in the spermatozoon should provide information concerning the organelle that accumulates  $Ca^{2+}$  via the ATP-dependent  $Ca^{2+}$  pump described here. Immunocytochemical analysis using polyclonal antibodies that recognize the cytoplasmatic C-terminal of  $IP_3$ -R revealed extensive staining in the acrosomal and postacrosomal regions of the head and along the tail, but not in the

midpiece of the sperm (Fig. 9). The acrosomal region was not stained in sperm without acrosome (see arrowhead in Fig. 9), indicating that the antibody specifically stained the acrosome. The localization of  $IP_3$ -R in the acrosome cap was previously demonstrated in hamster, rat, mouse, and dog sperm [11].

#### Changes in $[Ca^{2+}]_i$ in Capacitated Sperm

Spectrofluorometric measurements of  $[Ca^{2+}]_i$  using Fura-2-loaded capacitated or noncapacitated bovine sperm revealed an increase in  $[Ca^{2+}]_i$  after the addition of thapsigargin (Fig. 10). In noncapacitated cells, the addition of  $Ca^{2+}$  caused a very slight increase in  $[Ca^{2+}]_i$ ; and the addition of thapsigargin was followed by a lag time of about 30 sec and then a fast increase in  $[Ca^{2+}]_i$  (Fig. 10A). In capacitated cells, the initial concentration of  $Ca^{2+}$  was higher than that in noncapacitated cells ( $60 \pm 20$  vs.  $25 \pm 10$  nM); addition of  $Ca^{2+}$  to the medium induced an almost 2.5-fold increase in  $[Ca^{2+}]_i$  ( $160 \pm 40$  nM), followed by a 7-fold increase after addition of thapsigargin ( $1100 \pm 250$  nM) (Fig. 10B). The response to thapsigargin was different between noncapacitated and capacitated sperm. In capacitated sperm there was no lag time, and the increase in  $Ca^{2+}$  was 3.9 times slower; but the final  $[Ca^{2+}]_i$  reached was twice as high ( $1100 \pm 250$  vs.  $500 \pm 150$  nM). These data clearly demonstrate that significant changes in the mechanisms involved in  $Ca^{2+}$  regulation occur during sperm capacitation.

#### DISCUSSION

In this study, we demonstrate three aspects of the role of intracellular  $Ca^{2+}$  stores in controlling the AR. 1) We show the existence of intracellular nonmitochondrial  $Ca^{2+}$  stores that actively accumulate  $Ca^{2+}$  by an ATP-dependent  $Ca^{2+}$  pump; 2) we demonstrate that inhibition of this pump by thapsigargin causes fast elevation of  $[Ca^{2+}]_i$ , first in the sperm head and later in the midpiece, and only in the presence of extracellular  $Ca^{2+}$ ; 3) we show that inhibition of this  $Ca^{2+}$  pump in capacitated sperm causes a much higher (2-fold) increase in  $[Ca^{2+}]_i$  than in noncapacitated cells and results in acrosomal exocytosis. For many years, it was believed that since a spermatozoon does not contain an endoplasmic reticulum, there is no intracellular nonmitochondrial  $Ca^{2+}$  store in this cell. Recently, it was shown that thapsigargin can cause an increase in sperm  $[Ca^{2+}]_i$  [8, 9] and that it induces the AR [9, 10, 12] in capacitated spermatozoa. Thapsigargin is a specific inhibitor of the endoplasmic reticulum  $Ca^{2+}$  pump [20], and its effect on sperm cells was the first indication of the existence of intracellular  $Ca^{2+}$  stores. Concerning the specificity of thapsigargin in spermatozoa, we showed here that the plasma membrane  $Ca^{2+}$  pump is not sensitive to thapsigargin (Fig. 4) while the  $Ca^{2+}$  pump of acrosomal membranes is highly inhibited by thapsigargin [12].

The first evidence for the existence of an intracellular ATP-dependent  $Ca^{2+}$  pump in rat sperm was suggested by Walensky and Snyder [11]. They followed ATP-dependent  $Ca^{2+}$  uptake in permeabilized sperm and attempted to prevent  $Ca^{2+}$  accumulation in the mitochondria by blocking mitochondrial respiration with sodium azide. However, under these conditions, the added ATP can be hydrolyzed by the mitochondrial  $H^+$ -ATPase, resulting in the creation of membrane potential and active accumulation of  $Ca^{2+}$  into the mitochondria. In the present study, we used the mitochondrial uncoupler FCCP and showed that under these

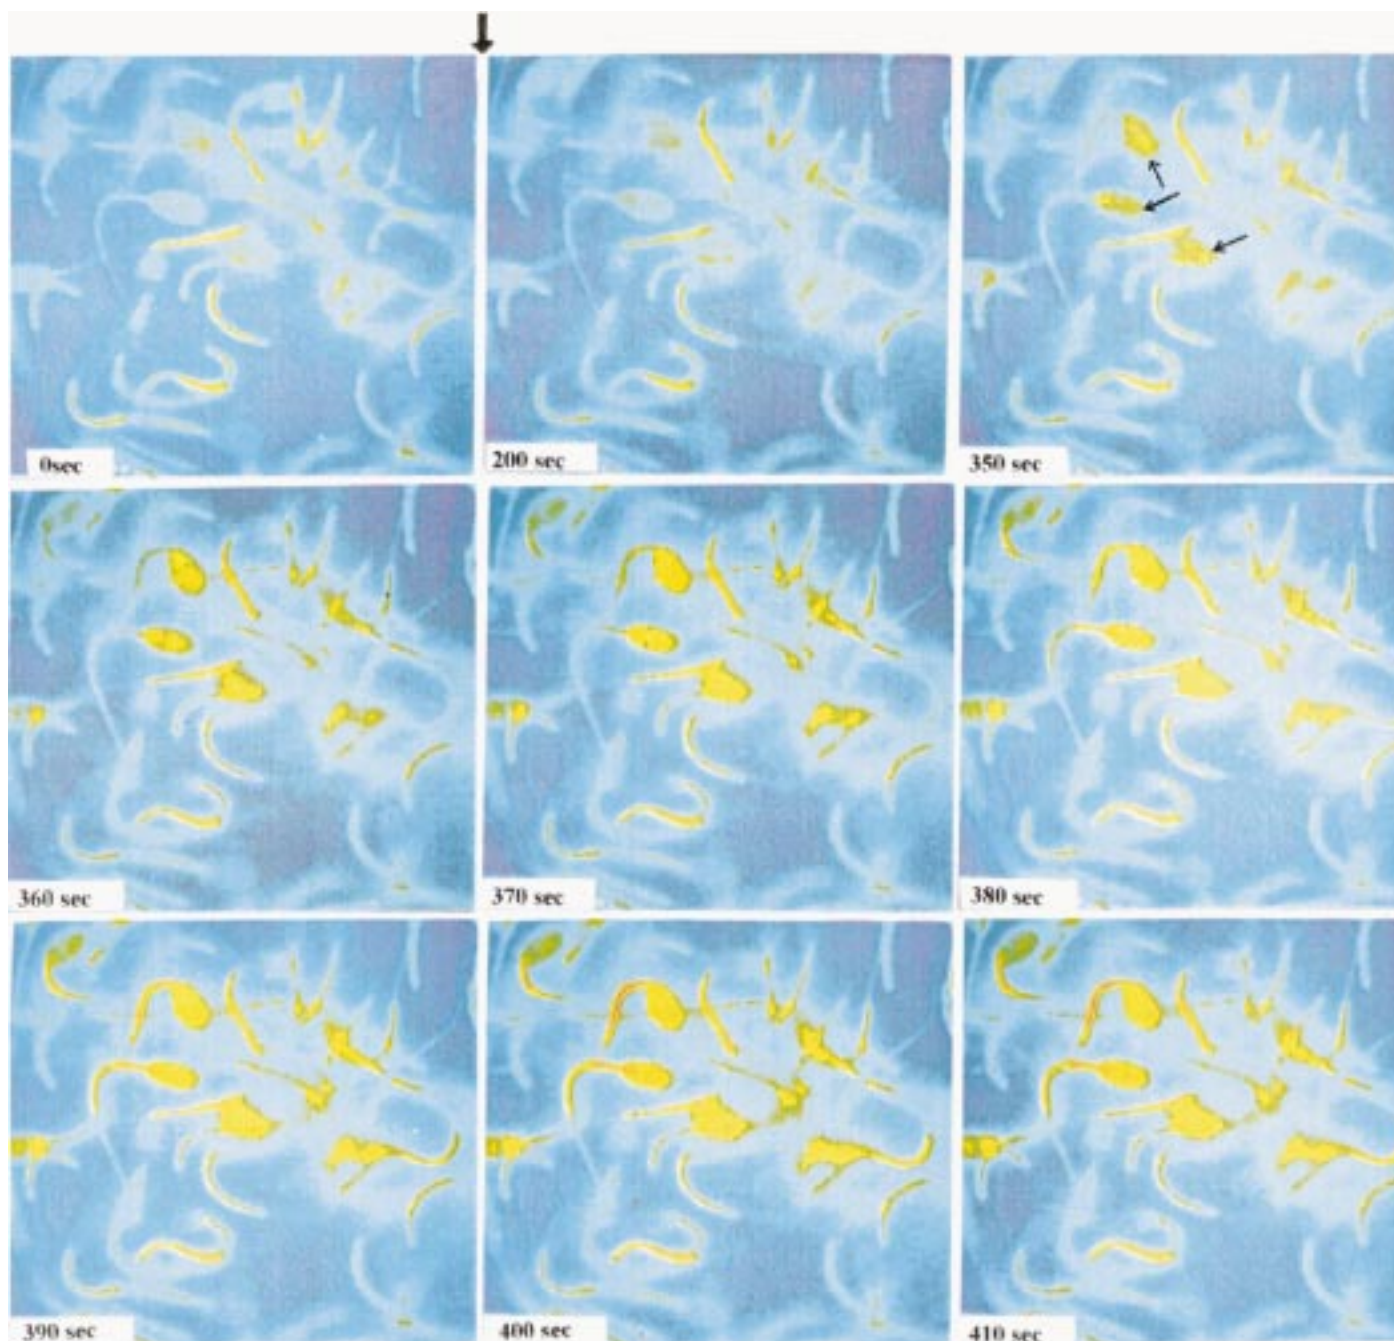

FIG. 7. Effect of thapsigargin on the spatial distribution of  $[Ca^{2+}]_i$ ; intact noncapacitated bovine sperm in TALP medium without  $Ca^{2+}$  were loaded with Fluo-3/AM and photographed successively at the indicated times (see *Materials and Methods*). Thapsigargin ( $3 \mu M$ ) was added at the beginning, and after 200 sec, 2 mM  $CaCl_2$  was added (see arrow). The arrows in the picture after 350 sec indicate an increase in  $[Ca^{2+}]_i$  in the sperm head.  $\times 1000$  (published at 90%).

conditions, the  $Ca^{2+}$  uptake into the permeabilized cells is much lower (Fig. 2). It is well known that in the presence of uncoupler, the mitochondrial membrane potential is dissipated—conditions under which no ATP synthesis or active  $Ca^{2+}$  uptake can take place. Thus the remaining  $Ca^{2+}$  uptake is highly suggestive of nonmitochondrial  $Ca^{2+}$  stores. The ATP-dependent  $Ca^{2+}$  uptake in permeabilized sperm is strongly inhibited by thapsigargin, and very little uptake can be seen in the presence of the  $Ca^{2+}$  ionophore A23187 (Fig. 3), indicating that  $Ca^{2+}$  is accumulated in intracellular nonmitochondrial  $Ca^{2+}$  stores.

In intact bull and ram spermatozoa, thapsigargin induces the acrosomal reaction (Fig. 1) as well as an increase in

$[Ca^{2+}]_i$  (Fig. 5). These effects are found only in the presence of extracellular  $Ca^{2+}$ ; they could not be seen when  $Ca^{2+}$  influx was blocked by the calcium blocker  $La^{3+}$  (Table 1) or when extracellular  $Ca^{2+}$  was chelated by EGTA (Fig. 6). Since the ATP-dependent  $Ca^{2+}$  pump of the plasma membrane is not affected by thapsigargin (Fig. 4), we suggest that the effect of thapsigargin on AR and  $[Ca^{2+}]_i$  is due to the inhibition of an intracellular  $Ca^{2+}$  pump. It is known that AR is a calcium-dependent process that requires extracellular  $Ca^{2+}$  [21]. In a wide range of somatic cells, release of calcium from internal stores also promotes extracellular calcium influx across the plasma membrane [22]. This phenomenon is called capacitative calcium entry. The



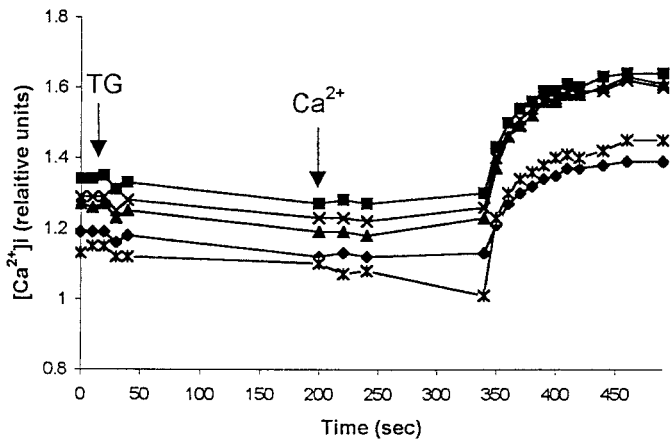

FIG. 8. Graphic presentation of  $[Ca^{2+}]_i$  in 5 randomly chosen noncapacitated bovine sperm cells loaded with Fluo-3/AM. The changes in  $Ca^{2+}$  were measured after addition of  $3 \mu M$  thapsigargin (TG) and  $2 mM$   $Ca^{2+}$ . The  $Ca^{2+}$  concentration scale is expressed in relative units.

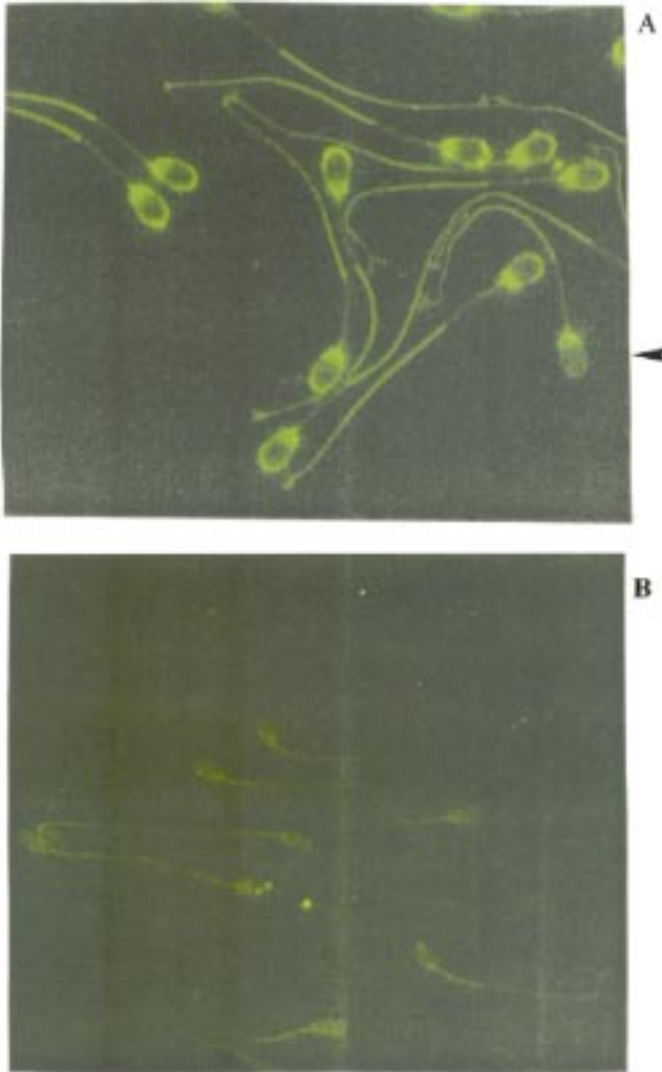

FIG. 9. Localization of  $IP_3$ -R in spermatozoa. **A**) Visualization of bovine sperm  $IP_3$ -R using rabbit polyclonal anti- $IP_3$ -R antibody and FITC-conjugated second antibody. Arrowhead: acrosome-reacted cell. **B**) Control using normal rabbit serum instead of rabbit anti- $IP_3$ -R antibody.

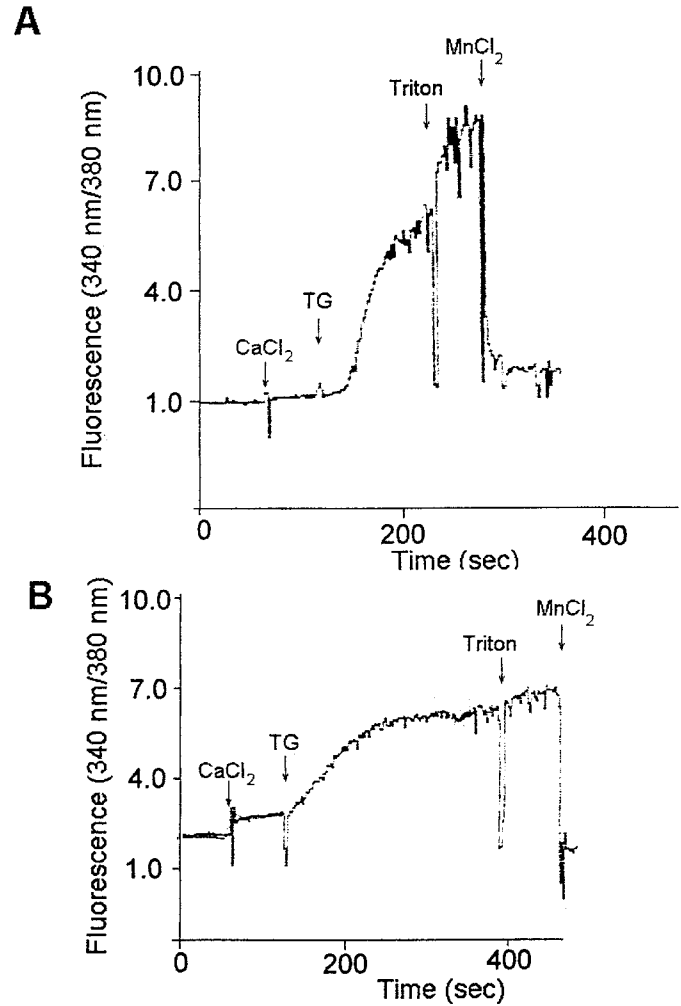

FIG. 10. Effect of capacitation on thapsigargin-induced changes in bovine sperm  $[Ca^{2+}]_i$ . Sperm ( $5 \times 10^6$  cells/ml) were capacitated for 3 h in TALP medium containing heparin, followed by 1-h incubation in the presence of Fura-2/AM. At the end of the capacitation time, the cells were washed and resuspended in TALP without  $Ca^{2+}$ , and changes in fluorescence were recorded. At the arrows, the following substances were added (final concentration):  $2 mM$   $CaCl_2$ ,  $3 \mu M$  thapsigargin (TG),  $0.1\%$  Triton X-100, and  $2 mM$   $MnCl_2$ . The data represent one experiment, typical of three repetitions performed with 3 different males. **A**) Noncapacitated sperm, incubated for 4 h in TALP without heparin.  $[Ca^{2+}]_i$  was  $25 \pm 10$  nM before addition of  $CaCl_2$ ,  $35 \pm 15$  nM after addition of  $CaCl_2$ , and  $500 \pm 150$  nM after addition of thapsigargin. **B**) Capacitated sperm:  $[Ca^{2+}]_i$  was  $60 \pm 20$  nM before addition of  $CaCl_2$ ,  $160 \pm 40$  nM after addition of  $CaCl_2$ , and  $1100 \pm 250$  nM after addition of thapsigargin.

mechanism for this phenomenon is not completely understood, although it is accepted that the opening of a calcium channel in the plasma membrane is due to reduction of  $Ca^{2+}$  in the internal stores [23]. Thus, the inhibition of internal  $Ca^{2+}$  pump by thapsigargin in the sperm will cause reduction of  $Ca^{2+}$  in this store, resulting in the opening of  $Ca^{2+}$  channel in the plasma membrane.

In many secretory cells, the initial focal release of  $Ca^{2+}$  from internal stores has a priming effect on exocytosis [24, 25]. Since acrosomal exocytosis can be induced by thapsigargin, it is likely that the internal  $Ca^{2+}$  store in sperm would be localized in close proximity to the region in which acrosomal exocytosis occurs, i.e., in the acrosomal region of the sperm head. In many somatic cell types, calcium stored in internal membranes is released via an  $IP_3$ -gated  $Ca^{2+}$  channel [22]. Thus, the localization

of IP<sub>3</sub>-R in the acrosome region of bull and ram sperm (Fig. 9) suggests that this organelle may function as a calcium store. This IP<sub>3</sub>-R was clearly localized in the acrosome of rat, hamster, mouse, and dog sperm, suggesting that the acrosome is the internal calcium store [11]. These authors also showed that ATP-dependent Ca<sup>2+</sup> uptake in permeabilized rat sperm is inhibited approximately 50% by inclusion of IP<sub>3</sub> in the incubation medium, suggesting that Ca<sup>2+</sup> is released from the store by IP<sub>3</sub>. The fact that they found only 50% inhibition by IP<sub>3</sub> suggests that under the Ca<sup>2+</sup> uptake conditions used, Ca<sup>2+</sup> is also accumulated in IP<sub>3</sub>-insensitive stores, possibly in the mitochondria, as suggested earlier in this discussion.

Working with isolated bull sperm acrosomes, we found that these membranes possess an ATP-dependent Ca<sup>2+</sup> uptake activity, which is blocked by thapsigargin [12]. In addition, these membranes possess a cAMP/protein kinase A (PKA)-dependent Ca<sup>2+</sup> channel, suggesting the existence on the acrosomal membrane of either a cAMP-gated calcium channel [26] or a channel opened upon phosphorylation by PKA [27]. Moreover, sperm acrosomes are rich in calreticulin, a high-capacity Ca<sup>2+</sup>-binding storage protein [28] that has been reported to copurify with an IP<sub>3</sub>-sensitive Ca<sup>2+</sup> store [29]. This information further supports our notion concerning the function of the acrosome as an intraspermatozoal calcium store.

During sperm capacitation, [Ca<sup>2+</sup>]<sub>i</sub> is enhanced in the acrosomal region of the head and in the tail [30]. In capacitated cells, thapsigargin induces a large increase in [Ca<sup>2+</sup>]<sub>i</sub> (Fig. 10), leading to acrosomal exocytosis. Thus, the data suggest that the internal Ca<sup>2+</sup> pump is active during the capacitation process.

The kinetics of Ca<sup>2+</sup> influx and the maximal [Ca<sup>2+</sup>]<sub>i</sub> induced by thapsigargin in capacitated cells differ from those found in noncapacitated sperm (Fig. 10). In capacitated cells, the maximal [Ca<sup>2+</sup>]<sub>i</sub> induced by thapsigargin is 1100 ± 100 nM, while in noncapacitated sperm the [Ca<sup>2+</sup>]<sub>i</sub> reached only 500 ± 60 nM. Since [Ca<sup>2+</sup>]<sub>i</sub> is higher in capacitated cells, and it accumulated in the acrosomal region, it is possible that a more significant reduction of acrosomal Ca<sup>2+</sup> induced in capacitated cells by thapsigargin causes greater influx of Ca<sup>2+</sup>. It is not clear why, after thapsigargin is added to noncapacitated cells, there is a lag time followed by a fast increase in [Ca<sup>2+</sup>]<sub>i</sub>, whereas in capacitated cells there is no lag time and the rate of Ca<sup>2+</sup> influx is much slower (Fig. 10). Similar results were obtained by Parrish et al. [9], who determined [Ca<sup>2+</sup>]<sub>i</sub> in individual bovine sperm using the imaging technique. Since we suggest that Ca<sup>2+</sup> in the acrosome of capacitated cells is higher than in noncapacitated cells, it takes longer to deplete the stores sufficiently to trigger calcium entry from the extracellular medium, and this is the rate-limiting step for activating the capacitative calcium entry mechanism.

Our suggestion concerning the possible accumulation of Ca<sup>2+</sup> in the acrosome during capacitation is further supported by the findings that phospholipase C (PLC), which hydrolyzes phosphoinositides to produce IP<sub>3</sub>, is activated by the egg zona pellucida (ZP<sub>3</sub>), indicating that IP<sub>3</sub>-dependent Ca<sup>2+</sup> release takes place only at the end of the capacitation process [31]. It was also shown that PLCγ is translocated to the sperm plasma membrane during capacitation [31, 32] prior to its activation by the egg zona pellucida. Thus, the formation of IP<sub>3</sub> just before the occurrence of AR would keep the acrosomal IP<sub>3</sub>-gated Ca<sup>2+</sup> channel inactive during capacitation, allowing the accumulation of Ca<sup>2+</sup> in the acrosome during the capacitation process.

Recently it was suggested that binding of sperm to zona pellucida may activate adenylyl cyclase to form cAMP that activates PKA to open a Ca<sup>2+</sup> channel in the acrosomal membrane [1]. As a result, the [Ca<sup>2+</sup>]<sub>i</sub> in the sperm cytosol is increased and PLC is activated to produce IP<sub>3</sub> and diacylglycerol. IP<sub>3</sub> would cause further release of acrosomal Ca<sup>2+</sup> via the IP<sub>3</sub>-gated Ca<sup>2+</sup> channel, resulting in Ca<sup>2+</sup> depletion in the acrosome and activating the capacitative calcium entry mechanism. This final step would cause a relatively high elevation of [Ca<sup>2+</sup>]<sub>i</sub> thereby activating actin-severing proteins, leading to dispersion of the F-actin barrier intervening between the outer acrosomal and the overlying plasma membrane [32]. The primed membranes would then be able to come into contact and fuse, releasing the acrosomal contents and completing the AR.

## REFERENCES

- Breitbart H, Spungin B. The biochemistry of the acrosome reaction. *Mol Hum Reprod* 1997; 3:195–202.
- Florman HM, Arnoult C, Kazam IG, Li C, O'Toole CM. A perspective on the control of mammalian fertilization by egg-activated ion channels in sperm: a tale of two channels. *Biol Reprod* 1998; 59:12–16.
- Breitbart H, Wehbie RS, Lardy HA. Regulation of calcium transport in bovine spermatozoa. *Biochim Biophys Acta* 1990; 1027:72–78.
- Breitbart H, Wehbie RS, Lardy HA. Calcium transport in bovine sperm mitochondria: effect of substrates and phosphate. *Biochim Biophys Acta* 1990; 1026:57–63.
- Breitbart H, Rubinstein S, Gruberger M. Calcium efflux mechanism in sperm mitochondria. *Biochim Biophys Acta* 1996; 1312:79–84.
- Breitbart H, Stern B, Rubinstein S. Calcium transport and Ca<sup>2+</sup>-ATPase activity in ram spermatozoa plasma membrane vesicles. *Biochim Biophys Acta* 1983; 728:349–355.
- Rufo GA, Schoff PK, Lardy HA. Regulation of calcium content in bovine spermatozoa. *J Biol Chem* 1984; 259:2547–2552.
- Blackmore PF. Thapsigargin elevates and potentiates the ability of progesterone to increase intracellular free calcium in human sperm: possible role of perinuclear calcium. *Cell Calcium* 1993; 14:53–60.
- Parrish JJ, Susko-Parrish J, Graham JK. *In vitro* capacitation of bovine spermatozoa: role of intracellular calcium. *Theriogenology* 1999; 51:461–472.
- Meizel S, Turner KO. Initiation of the human sperm acrosome reaction by thapsigargin. *J Exp Zool* 1993; 267:350–355.
- Walensky LD, Snyder SH. Inositol 1,4,5-triphosphate receptors selectively localized to the acrosomes of mammalian sperm. *J Cell Biol* 1995; 130:857–869.
- Spungin B, Breitbart H. Calcium mobilization and influx during sperm exocytosis. *J Cell Sci* 1996; 109:1947–1955.
- Parrish JJ, Susko-Parrish J, Winer MA, First NL. Capacitation of bovine sperm by heparin. *Biol Reprod* 1988; 38:1171–1180.
- Ben-Av P, Rubinstein S, Breitbart H. Induction of acrosomal reaction and calcium uptake in ram spermatozoa by ionophores. *Biochim Biophys Acta* 1988; 939:214–222.
- Mendoza C, Carreras A, Moos J, Tesarik J. Distinction between true acrosome reaction and degenerative acrosome loss by a one-step staining method using *Pisum sativum* agglutinin. *J Reprod Fertil* 1992; 95:755–763.
- Gryniewicz G. A new generation of Ca<sup>2+</sup> indicators with greatly improved fluorescence properties. *J Biol Chem* 1985; 260:3440–3450.
- Tsien RY, Pozzan T, Rink TJ. Calcium homeostasis in intact lymphocytes: cytoplasmic free calcium monitored with a new, intracellularly trapped fluorescent indicator. *J Cell Biol* 1982; 94:325–334.
- Cohen N, Lubart R, Rubinstein S, Breitbart H. Light irradiation of mouse spermatozoa: stimulation of *in vitro* fertilization and calcium signals. *Photochem Photobiol* 1998; 68:407–413.
- Lytton J, Westlin M, Hanley MR. Thapsigargin inhibits the sarcoplasmic or endoplasmic reticulum Ca-ATPase family of calcium pumps. *J Biol Chem* 1991; 266:17067–17071.
- Thastrup O, Cullen PJ, Drobak BK, Hanley MR, Dawson AP. Thapsigargin, a tumor promoter discharges intracellular Ca<sup>2+</sup> stores by specific inhibition of the endoplasmic reticulum Ca<sup>2+</sup>-ATPase. *Proc Natl Acad Sci USA* 1990; 87:2466–2470.
- Yanagimachi R, Usui N. Calcium dependence of the acrosome reaction and activation of the guinea pig spermatozoa. *Exp Cell Res* 1974; 89:161–174.



22. Berridge MJ, Irvine RF. Inositol phosphates and cell signalling. *Nature* 1989; 341:197–205.
23. Putney JWJ. Capacitative calcium entry revisited. *Cell Calcium* 1990; 11:611–624.
24. Marty A. Calcium release and internal calcium regulation in acinar cells of exocrine glands. *J Membr Biol* 1991; 124:189–197.
25. Blondel O, Moody MM, Depaoli AM, Sharp AH, Ross CA, Swift H, Bell GI. Localization of inositol trisphosphate receptor subtype 3 to insulin and somatostatin secretory granules and regulation of expression in islets and insulinoma cells. *Proc Natl Acad Sci USA* 1994; 91:7777–7781.
26. Kaupp UB. The cyclic nucleotide-gated channels of vertebrate photoreceptors and olfactory epithelium. *Trends Neurosci* 1991; 14:150–157.
27. Reuter H. Modulation of ion channels by phosphorylation and second messengers. *News Pharm Sci* 1987; 2:168–171.
28. Nakamura M, Moriya M, Baba T, Michikawa Y, Yamanobe T, Arai K, Okinaga S, Kobayashi T. An endoplasmic reticulum protein, calreticulin, is transported into the acrosome of rat sperm. *Exp Cell Res* 1993; 205:101–110.
29. Krause KH, Simmerman HK, Jones LR, Campbell KP. Sequence similarity of calreticulin with a  $Ca^{2+}$ -binding protein that co-purifies with an  $Ins(1,4,5)P_3$ -sensitive  $Ca^{2+}$  store in HL-60 cells. *Biochem J* 1990; 270:545–548.
30. Florman HM. Sequential focal and global elevations of sperm intracellular  $Ca^{2+}$  are initiated by the zona pellucida during acrosomal exocytosis. *Dev Biol* 1994; 165:152–164.
31. Tomes CN, McMaster CR, Saling PM. Activation of mouse sperm phosphatidylinositol-4,5 bisphosphate-phospholipase C by zona pellucida is modulated by tyrosine phosphorylation. *Mol Reprod Dev* 1996; 43:196–204.
32. Spungin B, Margalit I, Breitbart H. Sperm exocytosis reconstructed in a cell-free system. Evidence for the involvement of phospholipase C and actin filaments in membrane fusion. *J Cell Sci* 1995; 108:2525–2535.
